# Supplementary material for: Photo-induced negative differential resistance and carrier-transport mechanisms in Bi2FeCrO6 resistive switching memory devices
Source: Royal Society of Chemistry journal article supplement (doi:10.1039/d1tc03282h), 2021-01-01
Supplement: d1tc03282h1.pdf [file d1tc03282h1.pdf]

**Photo-induced negative differential resistance and carrier-transport mechanisms  
in the  $\text{Bi}_2\text{FeCrO}_6$  resistive switching memory devices**

Songcheng Hu<sup>a</sup>, Zhenhua Tang<sup>a,b\*</sup>, Li Zhang<sup>a</sup>, Dijie Yao<sup>a</sup>, Zhigang Liu<sup>a</sup>,  
Siming Zeng<sup>c</sup>, Xiaobin Guo<sup>a</sup>, Yanping Jiang<sup>a</sup>, Xin-Gui Tang<sup>a</sup>, Lin Ma<sup>a</sup>,  
Zhaogang Nie<sup>a</sup> and Ju Gao<sup>d</sup>

<sup>a</sup>School of Physics and Optoelectric Engineering, Guangdong University of Technology, Guangzhou Higher Education Mega Center, Guangzhou, 510006, China

<sup>b</sup>Guangdong Provincial Key Laboratory of Electronic Functional Materials and Devices, Huizhou University, Huizhou 516001, Guangdong, China.

<sup>c</sup>Experimental Teaching Center, Guangdong University of Technology, Guangzhou 510006, China

<sup>d</sup>Department of Physics, The University of Hong Kong, Pokfulam Road, Hong Kong, China

---

\* Electronic mail: [tangzh@gdut.edu.cn](mailto:tangzh@gdut.edu.cn). (Z. H. Tang)

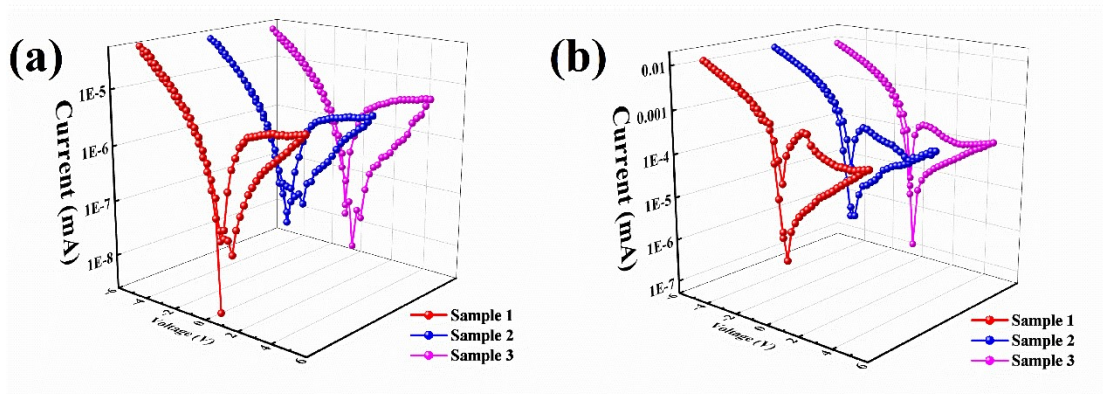

**Fig. S1** The  $I$ - $V$  cycle characteristic curves (-5.0 V to 5.0 V) of different Au/BFCO/FTO device: (a) in the dark and (b) under light-illumination.

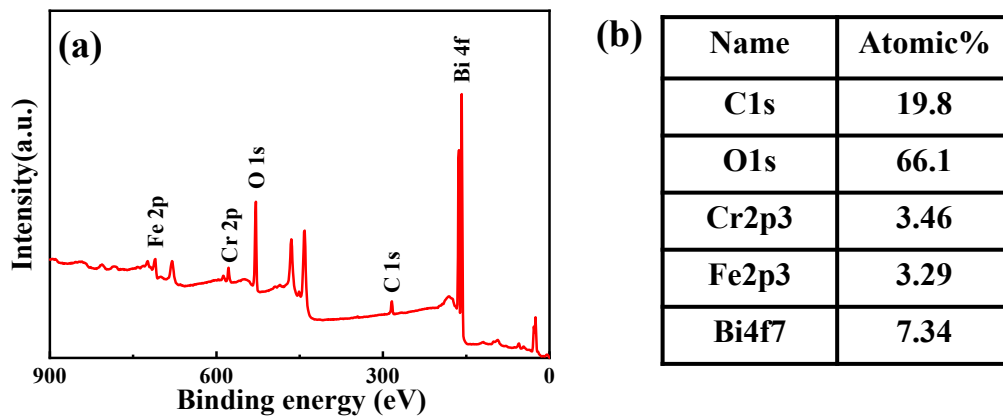

**Fig. S2** (a) The XPS characteristic spectrum of BFCO film. (b) The atomic ratio of the Bi, Fe, and Cr of the BFCO thin film.

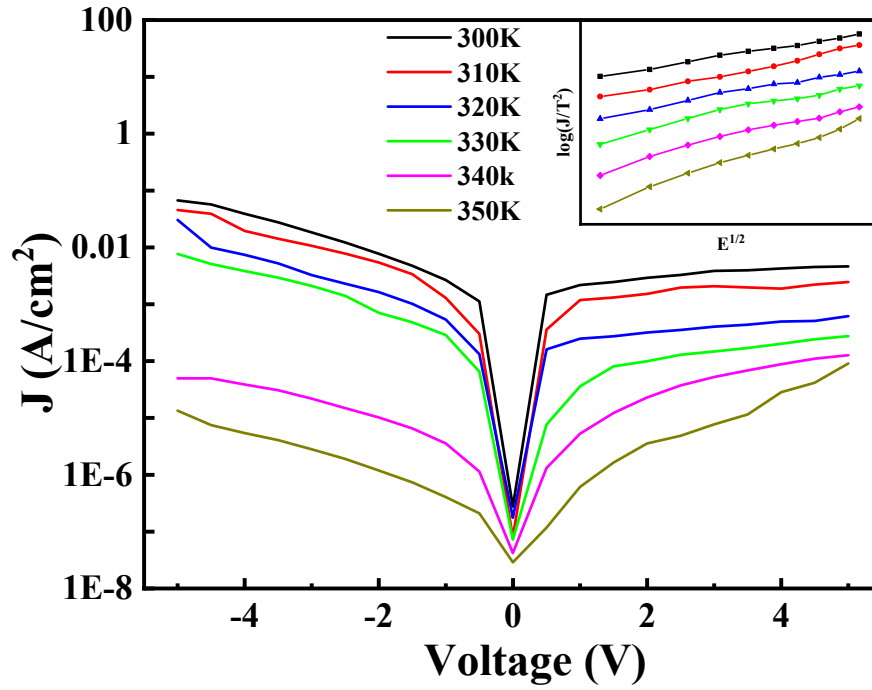

**Fig. S3**  $J$ - $V$  curves and  $\log(J/T^2)$ - $E^{1/2}$  of Au/BFCO/FTO devices at different temperatures

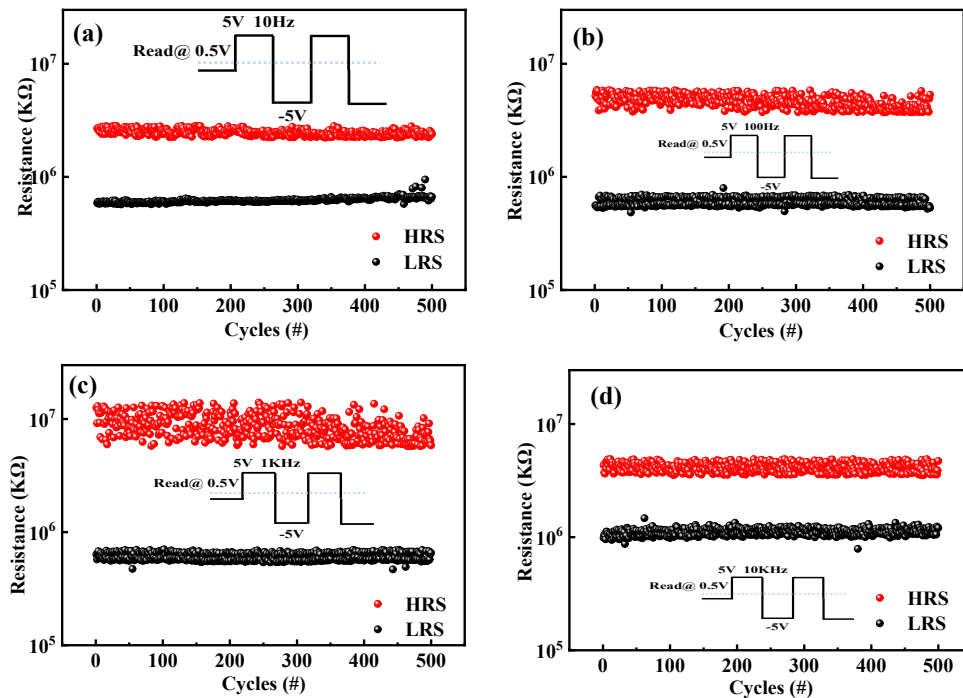

**Fig. S4** RS of pulse signals of different frequencies: (a) 10 Hz, (b) 100 Hz, (c) 1K Hz, and (d) 10K Hz
